# Supplementary material for: First principles study on monolayer GeTe as an anode material for multivalent ion batteries
Source: Royal Society of Chemistry journal article supplement (doi:10.1039/d4cp03568b), 2024-11-27
Supplement: d4cp03568b1.pdf [file d4cp03568b1.pdf]

# First principles study on monolayer GeTe as an anode material for multivalent ion batteries

Junjie Chen<sup>a,\*</sup>, Zhiyu Zhou<sup>a</sup>, Ruidan Zhang<sup>b,\*</sup>

<sup>a</sup>Chengyi College, Jimei University, Xiamen 361021, China

<sup>b</sup>College of Physics and Energy, Fujian Normal University, Fujian Provincial Solar  
Energy Conversion and Energy Storage Engineering Technology Research Center,  
Fuzhou 350117, China

**\*Corresponding author:**

Junjie Chen, Email: 202051000007@jmu.edu.cn;

Ruidan Zhang, Email: rdzhang@fjnu.edu.cn

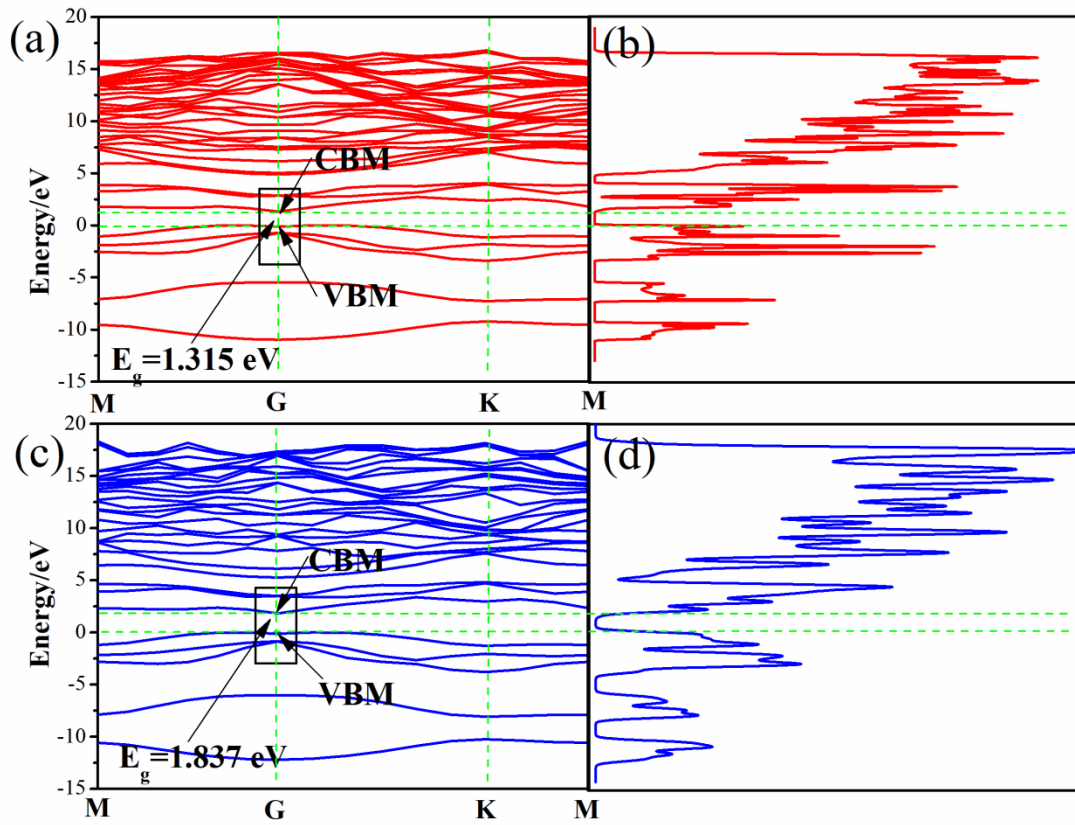

Fig. S1 Band structure and corresponding density of states of monolayer GeTe with (a-b) GGA-PBE and (c-d) HSE06 function

Table S1

Comparison of volume expansion values between some common two-dimensional materials and monolayer GeTe in different metal ion batteries

|                                                | Li                 | Na                 | K                  | Al                 | Mg                 | Ca                 |
|------------------------------------------------|--------------------|--------------------|--------------------|--------------------|--------------------|--------------------|
|                                                | volume expansion % |
| GeTe (this work)                               |                    |                    |                    | 14.3               | 15.7               | 25.8               |
| Ge <sup>[1]</sup>                              | 253                | 207                | 351                |                    | 231                | 389                |
| BGe <sup>[2]</sup>                             |                    |                    |                    |                    | 5.63               |                    |
| a-C <sub>3</sub> N <sub>2</sub> <sup>[3]</sup> | 4                  |                    |                    |                    |                    |                    |
| Phosphoene <sup>[4]</sup>                      |                    | 16                 |                    |                    |                    |                    |
| MoS <sub>2</sub> <sup>[5]</sup>                |                    | 27                 |                    |                    |                    |                    |
| graphite <sup>[6]</sup>                        |                    | 12                 |                    |                    |                    |                    |
| Red phosphorus <sup>[7]</sup>                  |                    | 491                |                    |                    |                    |                    |
| BSi <sup>[8]</sup>                             | 33                 |                    |                    |                    |                    |                    |
| Si <sup>[9]</sup>                              | 300                |                    |                    |                    |                    |                    |
| SiOx <sup>[10]</sup>                           | 150                |                    |                    |                    |                    |                    |
| Si/Graphite <sup>[11]</sup>                    | 74.4               |                    |                    |                    |                    |                    |
| Sn <sup>[12]</sup>                             | 260                |                    |                    |                    |                    |                    |
| GeSe <sub>2</sub> <sup>[13]</sup>              | 200                |                    |                    |                    |                    |                    |

## References

- [1] C. Kim, U. Hwang, S. Lee, Y.K. Han, *Nanomaterials*, 2023, **13**, 2868.
- [2] S.Y. Chen, X.J. Ye and C.S. Liu, *Phys. Lett. A*, 2023, **475**, 128848.
- [3] X.Y. Cai, W.C. Yi, J. Chen, L.G. Lu, B. Sun, Y.X. Ni, S.A.T. Redfern, H.Y. Wang, Z.F. Chen and Y.Z. Chen, *J. Mater. Chem. A*, 2022, **10**, 6551-6559.
- [4] V.V. Kulish, O.I. Malyi, C. Persson and P.Wu, *Phys. Chem. Chem. Phys.*, 2015, **17**, 13921-13928.

- [5] M. Mortazavi, C. Wang, J.K. Deng, V.B. Shenoy and N.V. Medhekar, *J. Power Sources*, 2014, **268**, 279-286.
- [6] W.J. Zhang, *J. Power Sources*, 2011, **196**, 13-24.
- [7] J. F. Qian, X. Y. Wu, Y. L. Cao, X. P. Ai and H. X. Yang, *Angew. Chem. Int. Ed.*, 2013, **52**, 4633–4636.
- [8] A. Samad, A. Shafique, U. Schwingenschlögl, Z.W. Ji and G.F. Luo, *Chemphyschem*, 2022, **23**, e202200041.
- [9] F. Z. Zhang, Y.Y. Ma, M.M. Jiang, W. Luo and J. P. Yang, *Rare Met.*, 2022, **41**, 1276-1283.
- [10] T. Chen, J. Wu, Q. L. Zhang and X. Su, *J. Power Sources*, 2017, **363**, 126-144.
- [11] M. Choi, E. Lee, J. Sung, N. Kim and M. Ko, *Nano Res.*, 2024, **17**, 5270-5277.
- [12] J.B. Cook, E. Detsi, Y.J. Liu, Y.L. Liang, H. Kim, X. Petrisans, B.S. Dunn and S.H. Tolbert, *ACS Appl. Mater. Interfaces*, 2017, **9**, 293-303.
- [13] Q.D. Chen, S. Tang, D. Feng, Y.H. Xie, F. Wu, D.L. Xie, Y. Mei and T.B.A. Zeng, *J. Alloy Compd.*, 2023, **968**, 172106.
